# Supplementary material
Source: Springer Nature journal article supplement (https://www.springermedizin.de/resource/supplementary/12906_2007_196_MOESM4_ESM.pdf/9524250)

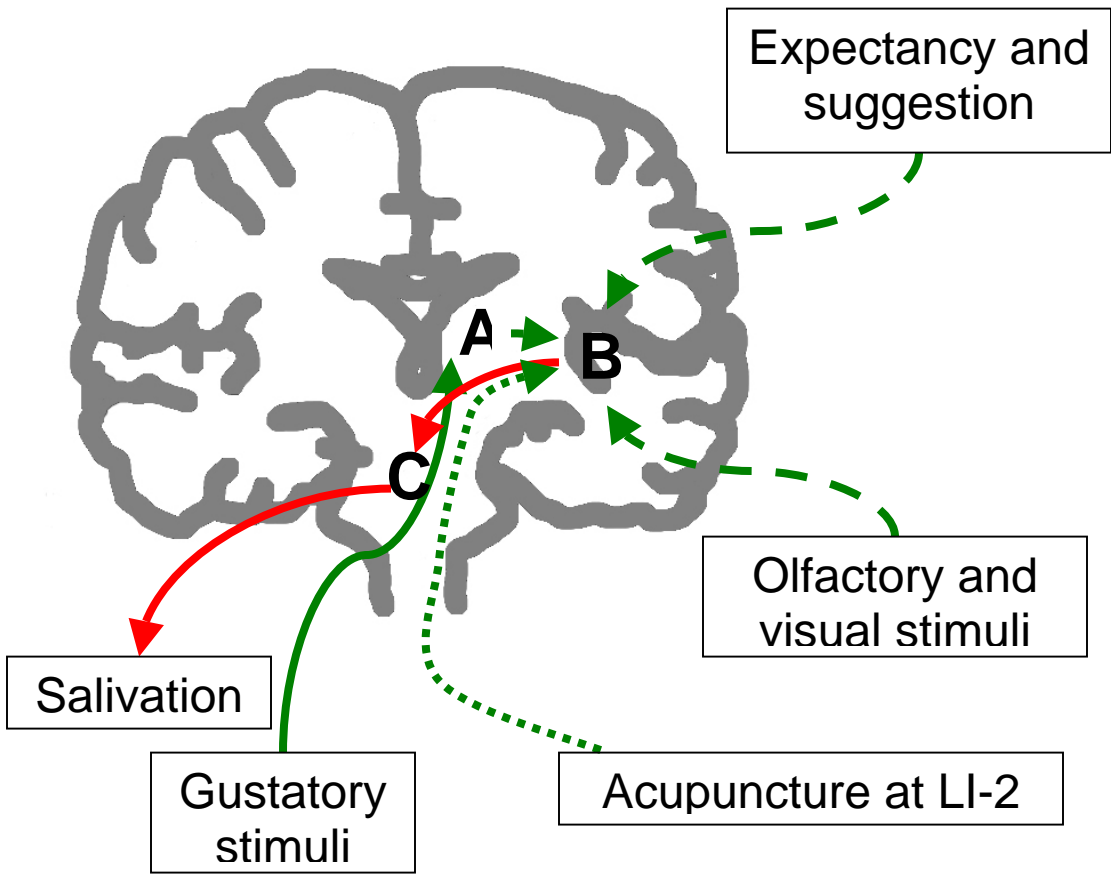

Supplement: MOESM4 [file 9524250]
